# Supplementary material for: Automatic and Reliable Leaf Disease Detection Using Deep Learning Techniques
Source: MDPI journal article supplement (doi:10.3390/agriengineering3020020), 2021-05-20
Supplement: s1 [file s1]

## Article

# Automatic and Reliable Leaf Disease Detection using Deep Learning Techniques

Muhammad E. H. Chowdhury <sup>1,\*</sup>, Tawsifur Rahman <sup>1</sup>, Amith Khandakar <sup>1</sup>, Mohamed Arselene Ayari <sup>2,\*</sup>, Aftab Ullah Khan <sup>3</sup>, Muhammad Salman Khan <sup>3,4</sup>, Nasser Al-Emadi <sup>1</sup>, Mamun Bin Ibne Reaz <sup>5</sup>, Mohammad Tariqul Islam <sup>5</sup> and Sawal Hamid Md Ali <sup>5</sup>

**Table S1.** Summary of the tomato leaf disease classification performance using non-segmented original leaf images.

| Classification scheme | Models                 | Result with 95% CI  |                     |                     |                     |                     |
|-----------------------|------------------------|---------------------|---------------------|---------------------|---------------------|---------------------|
|                       |                        | Overall             | Weighted            |                     |                     |                     |
|                       |                        | Accuracy            | Precision           | Sensitivity         | F1-score            | Specificity         |
| 2 Class               | EfficientNet-b0        | 98.4 ± 0.18         | 96.2 ± 0.28         | 94.8 ± 0.32         | 95.2 ± 0.31         | 98.6 ± 0.17         |
|                       | EfficientNet-b4        | 98.42 ± 0.18        | 96.32 ± 0.27        | 95.21 ± 0.31        | 95.4 ± 0.3          | 98.66 ± 0.17        |
|                       | <b>EfficientNet-b7</b> | <b>98.9 ± 0.15</b>  | <b>96.56 ± 0.27</b> | <b>95.4 ± 0.3</b>   | <b>96.12 ± 0.28</b> | <b>98.85 ± 0.16</b> |
| 6 Class               | EfficientNet-b0        | 96.86 ± 0.25        | 96.84 ± 0.25        | 96.84 ± 0.25        | 96.84 ± 0.25        | 99.18 ± 0.13        |
|                       | EfficientNet-b4        | 96.74 ± 0.26        | 96.76 ± 0.26        | 96.74 ± 0.26        | 96.74 ± 0.26        | 99.25 ± 0.13        |
|                       | <b>EfficientNet-b7</b> | <b>97.99 ± 0.2</b>  | <b>97.99 ± 0.2</b>  | <b>97.99 ± 0.2</b>  | <b>97.98 ± 0.2</b>  | <b>99.54 ± 0.1</b>  |
| 10 Class              | EfficientNet-b0        | 96.82 ± 0.26        | 96.83 ± 0.25        | 96.82 ± 0.26        | 96.82 ± 0.26        | 99.25 ± 0.13        |
|                       | EfficientNet-b4        | 96.92 ± 0.25        | 96.93 ± 0.25        | 96.92 ± 0.25        | 96.93 ± 0.25        | 99.3 ± 0.12         |
|                       | <b>EfficientNet-b7</b> | <b>97.44 ± 0.23</b> | <b>97.45 ± 0.23</b> | <b>97.44 ± 0.23</b> | <b>97.44 ± 0.23</b> | <b>99.35 ± 0.12</b> |

## Score-CAM Heat Map

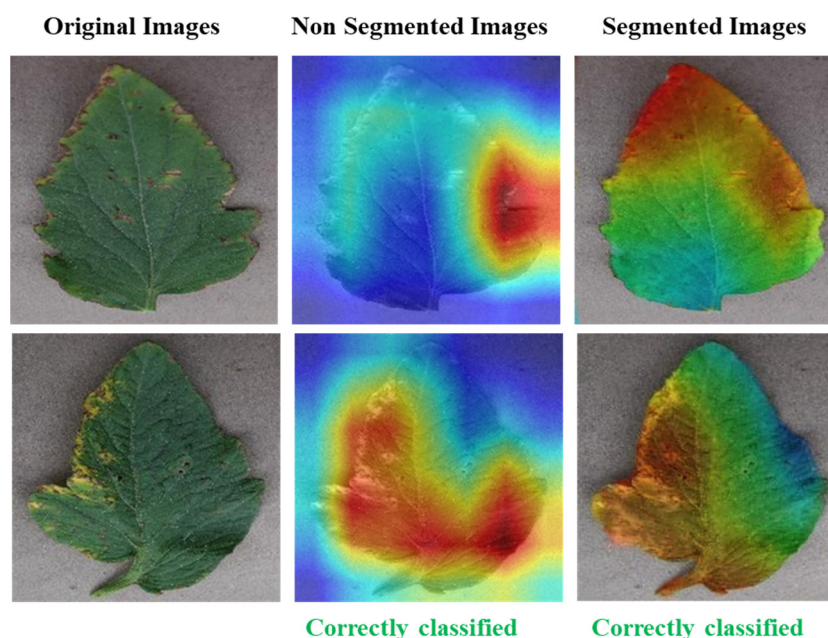

**Figure S1.** Score-CAM visualization to confirm how segmentation has helped in classification even incorrectly classified images.
